# Supplementary material
Source: publisher figshare collection journal article supplement (https://sage.figshare.com/ndownloader/files/24026897)
Supplement: Supplementary file 1 [file 24026897]

# Highlights

> Wind resource assessments at Funafuti and Nukufetau islands of Tuvalu are carried out. > Average wind speeds were 6.19 m/s and 5.36 m/s at 34 m height for the two sites. > The predominant wind direction was East/Nouth-East for both the sites. > The Weibull parameters were estimated using ten different methods. > Estimates of annual energy production and payback time gave encouraging results.
